# Supplementary material
Source: MDPI journal article supplement (https://www.mdpi.com/2306-5729/4/1/8)
Supplement: s1 [file s1]

# Supporting Materials to

## Spatio-temporal analysis of urban mobility using aggregate mobile phone derived presence and demographic data. A case study in the city of Rome, Italy.

Claudio Gariazzo <sup>1\*</sup>, Armando Pelliccioni <sup>1</sup> and Maria Paola Bogliolo <sup>2</sup>

<sup>1</sup> INAIL, Department of Occupational & Environmental Medicine, Via Fontana Candida 1, 00040, Monteporzio Catone (RM), Italy; a.pelliccioni@inail.it

<sup>2</sup> INAIL, Department of Technological Innovation, Via R. Ferruzzi, 38/40, 00143 Rome, Italy; m.bogliolo@inail.it

\* Correspondence: c.gariazzo@inail.it; Tel.: +39-06-94181525

**Table S1.** Amount of units and employees in the Lazio region by economic macro-categories according to Census 2011.

| Macro-category                                            | Number of productive units | Number of employees     |
|-----------------------------------------------------------|----------------------------|-------------------------|
| Agriculture, forestry and fishing                         | 1,397 (0.3%)               | 3,261 (0.1%)            |
| Cave and mine mineral extraction                          | 265 (0.1%)                 | 3,556 (0.2%)            |
| Manufacturing                                             | 25,331 (5.2%)              | 159,125 (6.9%)          |
| Supply of electric energy, gas vapor and air conditioning | 853 (0.2%)                 | 10,857 (0.5%)           |
| Supply of water; sewage, handling of waste                | 1,211 (0.2%)               | 19,544 (0.8%)           |
| Constructions                                             | 50,165 (10.2%)             | 139,419 (6%)            |
| Wholesale and retail commerce                             | 115,124 (23.5%)            | 306,410 (13.2%)         |
| Transport and storage services                            | 16,041 (3.3%)              | 145,741 (6.3%)          |
| Accommodations and food services                          | 31,074 (6.3%)              | 125,076 (5.4%)          |
| Information and communication services                    | 15,407 (3.1%)              | 110,058 (4.7%)          |
| Financial and insurance services                          | 13,497 (2.8%)              | 69,352 (3%)             |
| Real estate services                                      | 21,556 (4.4%)              | 22,951 (1%)             |
| Professional, scientific and technical services           | 79,078 (16.1%)             | 158,402 (6.8%)          |
| Renting, travel agencies and enterprise support services  | 21,661 (4.4%)              | 161,787 (7%)            |
| Public administration, and defense, social insurance      | 1,939 (0.4%)               | 129,756 (5.6%)          |
| Education                                                 | 8,570 (1.7%)               | 158,989 (6.9%)          |
| Health and social assistance                              | 37,176 (7.6%)              | 230,386 (9.9%)          |
| Artistic, sports and entertainment activities             | 22,240 (4.5%)              | 169,848 (7.3%)          |
| Other services                                            | 28,117 (5.7%)              | 192,945 (8.3%)          |
| <b>TOTAL</b>                                              | <b>490,702 (100%)</b>      | <b>2,317,463 (100%)</b> |

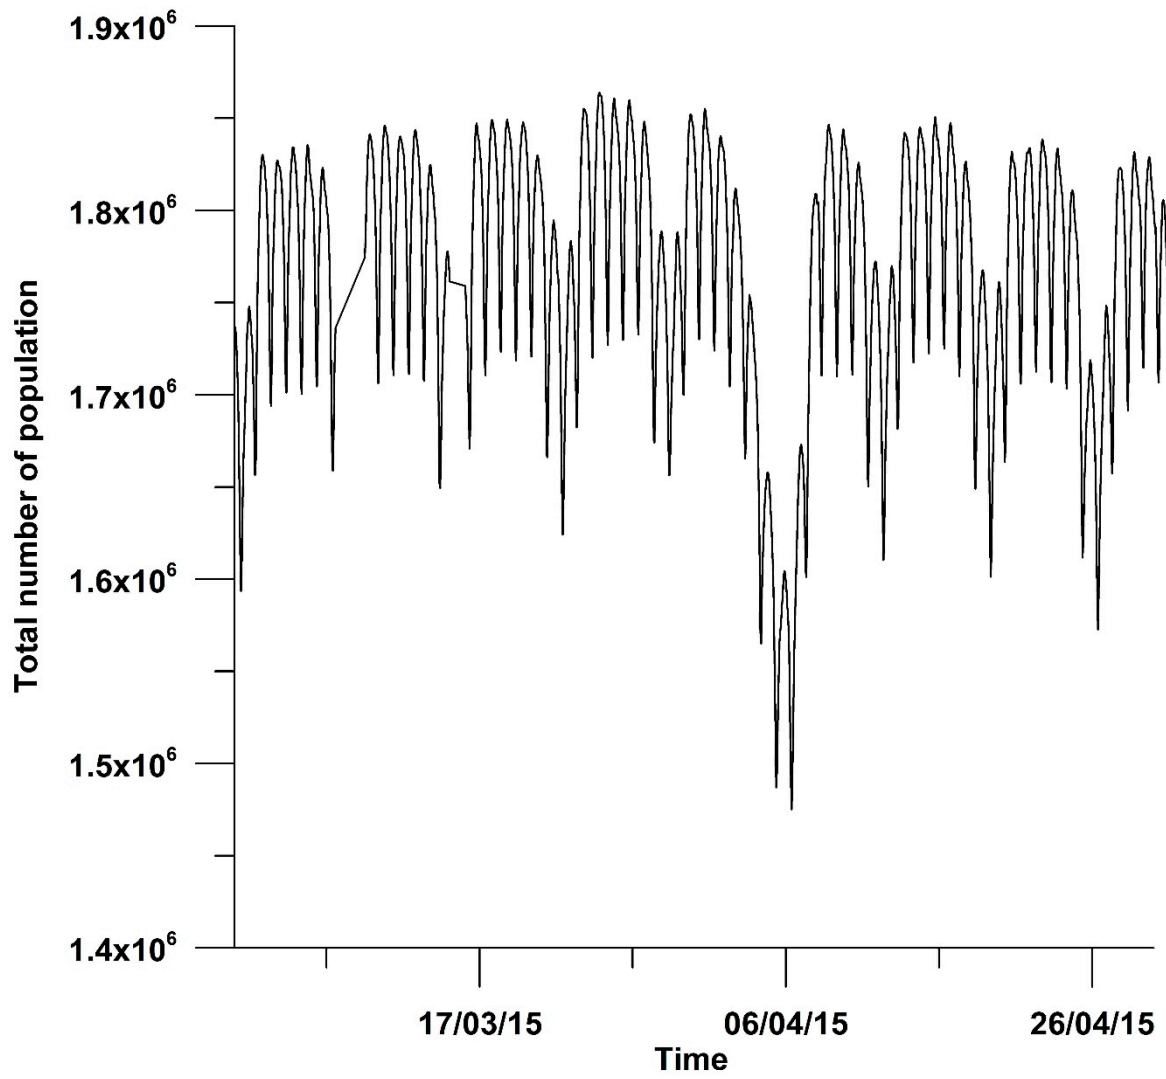

Figure S1. Time series of the total population located in the grid domain during the study period.

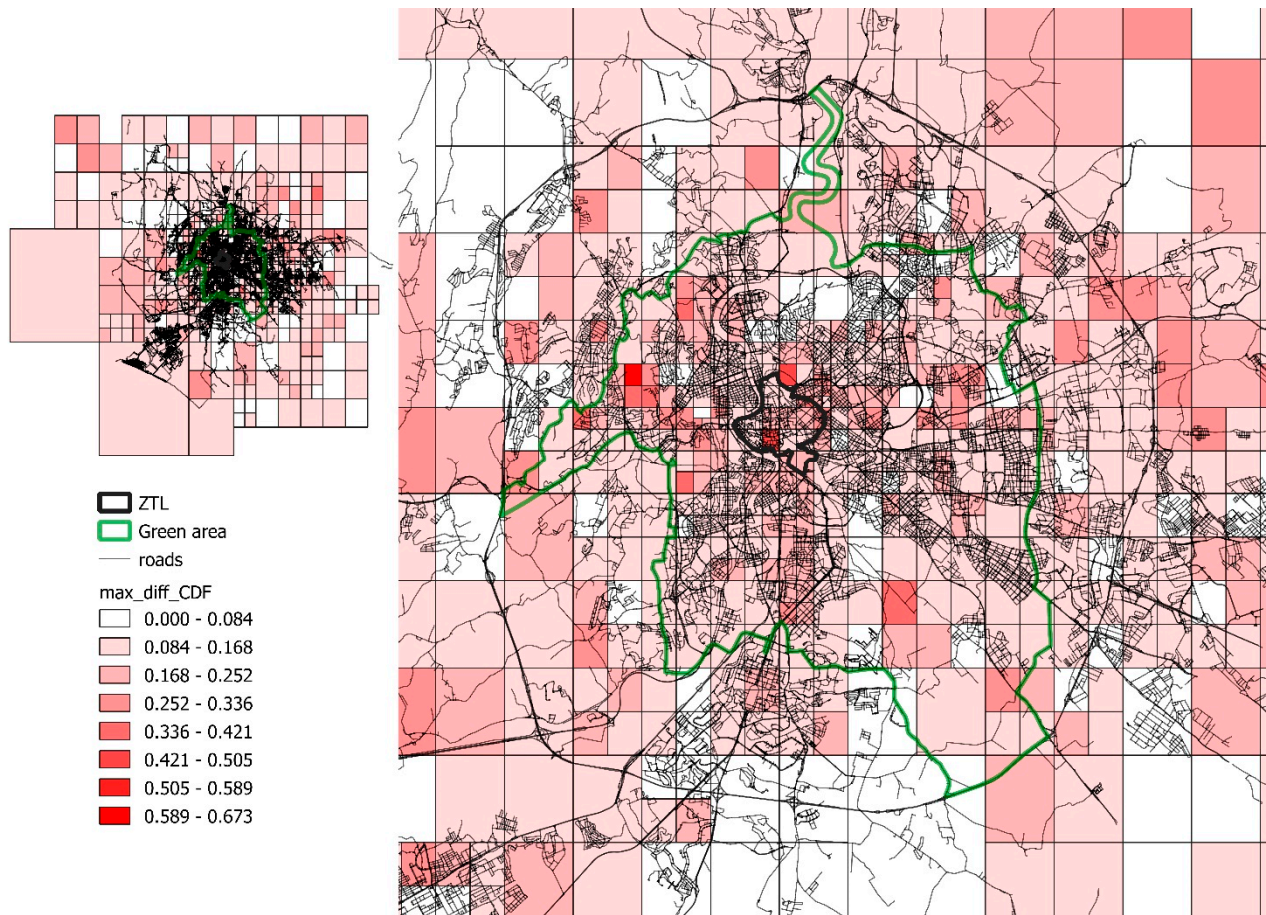

**Figure S2.** Map of the maximum difference of mobile phone and census age population CDFs for the city of Rome.

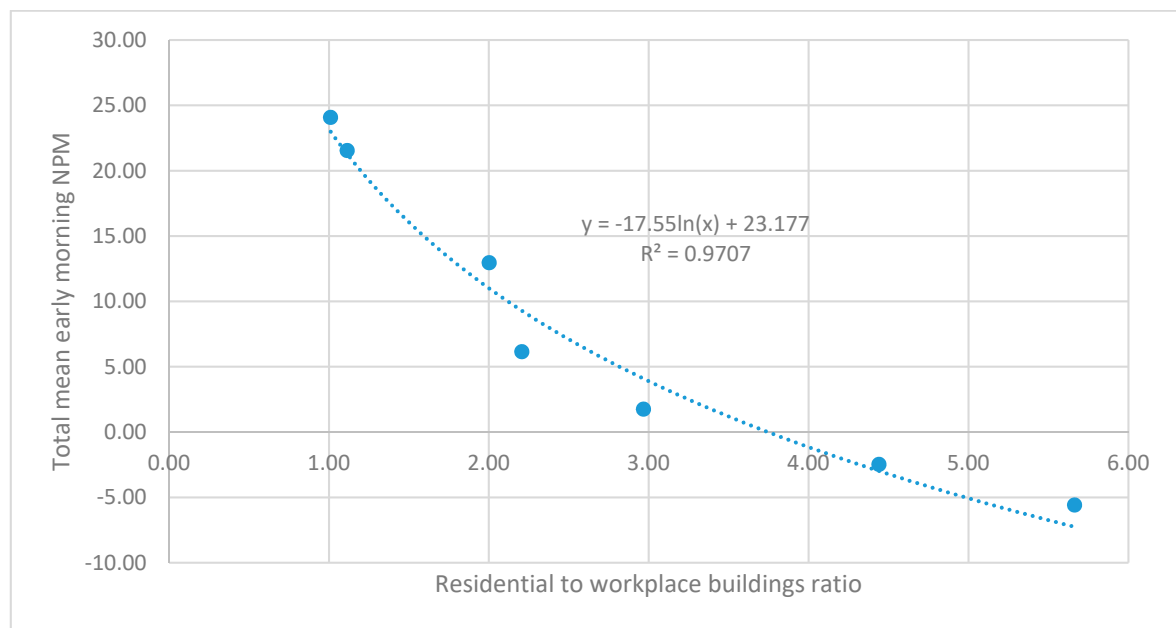

**Figure S3.** Plot of Total mean early morning NPM mobility vs. mean density of residential to workplace buildings ratio.

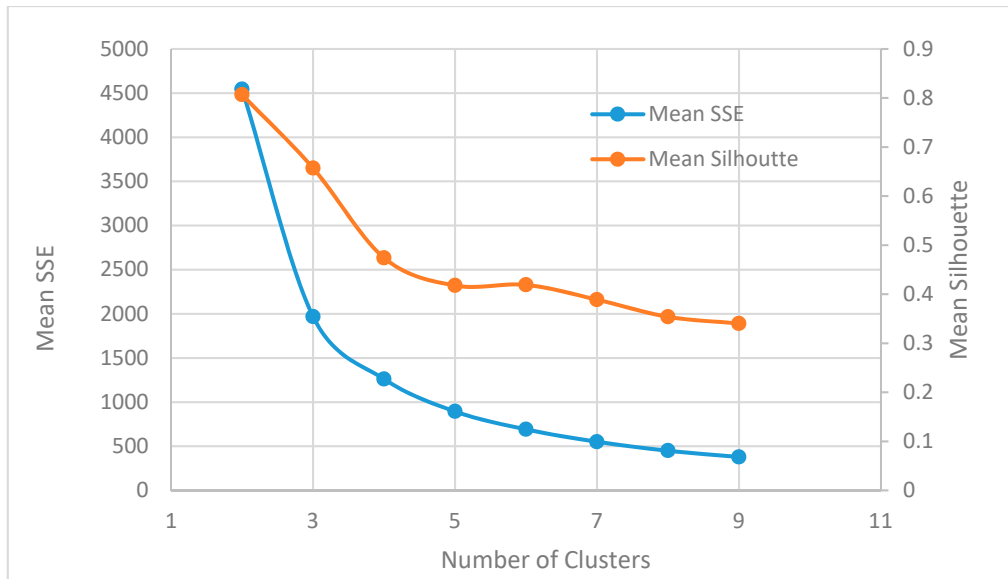

**Figure S4.** Plot of Sum Squared Error (SSE) and Silhouette vs. number of clusters.
